# Supplementary material for: Low-Dose Ionizing Radiation Modulates Microglia Phenotypes in the Models of Alzheimer’s Disease
Source: PubMed Central journal article supplement (PMC7353052; doi:10.3390/ijms21124532), 2020-06-25
Supplement: ijms-21-04532-s001.pdf [file ijms-21-04532-s001.pdf]

## Supplementary figure

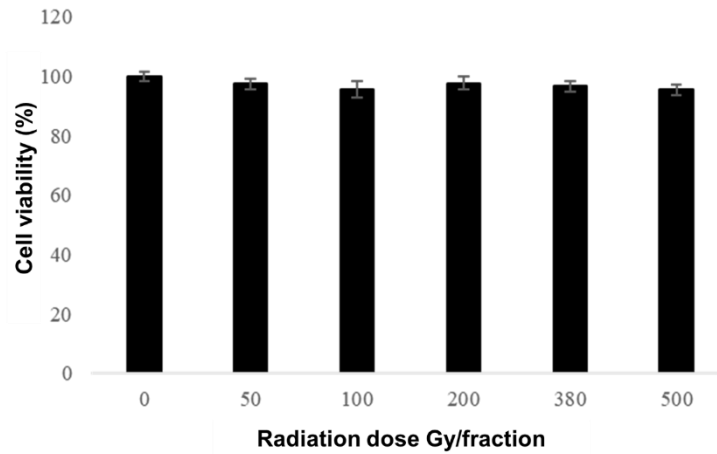

**Supplement figure 1.** BV-2 cells were exposed to various dose of LDIR. 12 h after treatment, cell proliferation was determined by Cell counting Kit-8. Data are presented as mean  $\pm$  SEM from triplicate experiments.

| Primer                         |           | Sequence                        |
|--------------------------------|-----------|---------------------------------|
| <b>TNF-<math>\alpha</math></b> | Sense     | 5'- TCGTAGCAAACCACCAAGTG-3'     |
|                                | Antisense | 5'- ATATAGCAAATCGGCTGACG -3'    |
| <b>IL-6</b>                    | Sense     | 5'-GAGGATACCACTCCCAACAGACC-3'   |
|                                | Antisense | 5'-AAGTGCATCATCGTTGTTTCATACA-3' |
| <b>IL-1<math>\beta</math></b>  | Sense     | 5'-CCTTCCAGGATGAGGACATGA -3'    |
|                                | Antisense | 5'-TGAGTCACAGAGGATGGGCTC -3'    |
| <b>TGF-<math>\alpha</math></b> | Sense     | 5'-TACCGCTGGGTATCCTGTTA-3'      |
|                                | Antisense | 5'-TTCTCATGTCTGCAGACGAG-3'      |
| <b>TGF-<math>\beta</math></b>  | Sense     | 5'-AAGAAGTCACCCGCGTGCTA-3'      |
|                                | Antisense | 5'-TGTGTGATGTCTTTGGTTTTGTCA-3'  |
| <b>IL-10</b>                   | Sense     | 5'-CCAAGCCTTATCGGAAATGA-3'      |
|                                | Antisense | 5'-TGGCCTTGTAGACACCTTGG-3'      |
| <b>TREM-2</b>                  | Sense     | 5'-GACCTCTCCACCAGTTTCTCC-3'     |
|                                | Antisense | 5'-TCAGAGTGATGGTGACGGTTC-3'     |
| <b>GAPDH</b>                   | Sense     | 5'- TGGCACAGTCAAGGCTGAGA-3'     |
|                                | Antisense | 5'-CTTCTGAGTGGCAGTGATGG-3'      |

**Supplement table 1.** primer sequences used for qRT-PCR.
